# Supplementary material for: Ethnic inequalities in acute myocardial infarction and stroke rates in Norway 1994–2009: a nationwide cohort study (CVDNOR)
Source: Springer Nature journal article supplement (doi:10.1186/s12889-015-2412-z), 2015-10-20
Supplement: MOESM1 [file 12889_2015_2412_MOESM1_ESM.pdf]

**Table A1** Regions and countries of birth. Norwegian residents aged 35-64, 1994-2009

| <b>Regions</b>                          | <b>Countries</b>                                                                                                                                                                                                                                                                                                                                                                                                                                                                                                                                                                                                                                                                                                                                                                                                                                                                                              |
|-----------------------------------------|---------------------------------------------------------------------------------------------------------------------------------------------------------------------------------------------------------------------------------------------------------------------------------------------------------------------------------------------------------------------------------------------------------------------------------------------------------------------------------------------------------------------------------------------------------------------------------------------------------------------------------------------------------------------------------------------------------------------------------------------------------------------------------------------------------------------------------------------------------------------------------------------------------------|
| <b>Norway</b><br>(n=2 354 572)          | Norway                                                                                                                                                                                                                                                                                                                                                                                                                                                                                                                                                                                                                                                                                                                                                                                                                                                                                                        |
| <b>Western Europe</b><br>(n=102 124)    | Denmark (n=20 055), Greenland (n=168), Finland (n=7 137), Faro islands (n=795), Sweden (n=23 702), Belgium (n=757), Andorra (n=4), France (n=2 972), Gibraltar (n=7), Greece (n=686), Ireland (n=569), Italy (n=1 640), Malta (n=48), Netherlands (n=5 159), Liechtenstein (n=12), Luxembourg (n=29), Monaco (n=4), Portugal (n=631), San Marino (n=4), Spain (n=1 607), Great Briatin (n=15 466), Switzerland (n=1 031), Germany (n=14 891), Austria (n=936), Israel (n=451), Cyprus (n=106), Iceland (n=3 257)                                                                                                                                                                                                                                                                                                                                                                                              |
| <b>Eastern Europe</b><br>(n=37 581 )    | Estonia (n=636), Bulgaria (n=1 066), Belarus (n=267), Latvia (n=711), Poland (n=21 297), Romania (n=1 403), Lithuania (n=2 456), Moldavia (n=110), Russia (n=5 617), Ukraine (n=844), Hungary (n=1 403), Slovakia (n=853), Georgia (n=105), Czech Republic (n=813)                                                                                                                                                                                                                                                                                                                                                                                                                                                                                                                                                                                                                                            |
| <b>Former Yugoslavia</b><br>(n=18 568)  | Albania (n=142), Croatia (n=1 693), Slovenia (n=111), Bosnia-Hercegovina (n=8 907), Macedonia (n=1 296 ), Serbia (n=1 325), Montenegro (n=174), Kosovo (n=4 920)                                                                                                                                                                                                                                                                                                                                                                                                                                                                                                                                                                                                                                                                                                                                              |
| <b>Middle East</b><br>(n=25 155)        | Turkey (n=6 028), Armenia (n=99), Aserbadsjan (n=142), Bahrain (n=8), The United Arab Emirates (n=11), Iraq (n=8 082), Iran (n=8 127), Jordan (n=113), Kuwait (n=102), Lebanon (n=1 075), Palestine (n=639), Qatar (n=3), Saudi Arabia (n=35), Syria (n=636), Yemen (n=52), Oman (n=3)                                                                                                                                                                                                                                                                                                                                                                                                                                                                                                                                                                                                                        |
| <b>North Africa</b><br>(n=5 881)        | Tunisia (n=604), Algeria (n=823), Egypt (n=475), Libya (n=91), Morocco (n=3 458), Sudan (n=362), Southern Sudan(n=68)                                                                                                                                                                                                                                                                                                                                                                                                                                                                                                                                                                                                                                                                                                                                                                                         |
| <b>Sub-Saharan Africa</b><br>(n=17 549) | Angola (n=149), Botswana (n=37), Equatorial Guinea (n=3), Ivory Coast (n=116), Eritrea (n=1 644), Ethiopia (n=1 733), Djibouti (n=8), Gambia (n=767), Ghana (n=1 072), Guinea (n=39), Guinea-Bissau (n=10), Cameroon (n=165), Cape Verde (n=350), Congo (n=520), Liberia (n=267), Madagascar (n=168), Mauritania (n=11) Mauritius (n=154), Namibia (n=50) Nigeria (n=518), Mozambique (n=83), Zimbabwe (n=132), Rwanda (n=182), São Tomé and Príncipe (n=1), Senegal (n=73), Central African Republic (n=2), Sierra Leone (n=208), Somalia (n=6 073), South Africa (n=649), Burundi (n=221), Comoros (n=4), Benin (n=8), Gabon (n=7), Congo-Brazzaville (n=46), Kenya (n=586), Lesotho (n=4), Malawi (n=59), Mali (n=23), West-Sahara (n=4), Niger (n=12), Réunion (n=6), Seychelles (n=11), Swaziland (n=6), Chad (n=15), Togo (n=55), Tanzania (n=611), Uganda (n=496), Zambia (n=171), Burkina Faso (n=20) |
| <b>South Asia</b><br>(n=23 301)         | Bangladesh (n=395), Bhutan (n=13), Myanmar (n=740), Sri Lanka (n=6 457), India (n=4 358), Nepal (n=256), Pakistan (n=11 082)                                                                                                                                                                                                                                                                                                                                                                                                                                                                                                                                                                                                                                                                                                                                                                                  |
| <b>Southeast Asia</b><br>(n=20 584 )    | Brunei (n=4), Phillipines (n=5 869), Indonesia (n=477), Cambodia (n=165), Laos (n=46) Malaysia (n=326), East-Timor (n=5), Singapore (n=275), Thailand (n=4 953), Vietnam (n=8 464)                                                                                                                                                                                                                                                                                                                                                                                                                                                                                                                                                                                                                                                                                                                            |
| <b>East Asia</b><br>(n=6 235)           | Taiwan (n=137), Hongkong (n=665), Japan (n=879), China (n=3 750), North-Korea (n=18), South-Korea (n=698), Mongolia (n=24), Macao (n=64)                                                                                                                                                                                                                                                                                                                                                                                                                                                                                                                                                                                                                                                                                                                                                                      |
| <b>Central Asia</b><br>(n=2 542)        | Afghanistan (n=1980), Kasakhstan (n=351), Tadsjikistan (n=29), Turkmenistan(n=25), Kirgisistan(n=45), Uzbekistan (n=112)                                                                                                                                                                                                                                                                                                                                                                                                                                                                                                                                                                                                                                                                                                                                                                                      |
| <b>North America</b><br>(n=11 679)      | Canada (n=1 642), USA (n=10 037)                                                                                                                                                                                                                                                                                                                                                                                                                                                                                                                                                                                                                                                                                                                                                                                                                                                                              |
| <b>Central America</b><br>(n=1 742 )    | Cayman Islands (n=2), Costa Rica (n=62), Cuba (n=335), Dominica (n=9), the Dominican Republic (n=190), Grenada (n=14), Guadeloupe (n=4), Haiti (n=13), Honduras (n=54), Jamaica (n=91), Martinique (n=9) Mexico (n=397), Aruba (n=19), Curacao (n=42), Nicaragua (n=64), Panama (n=27), El Salvador (n=75), Saint Lucia (n=3), Saint Vincent and Grenadine (n=2), Trinidad and Tobago (n=272), American Virgin Islands (n=2), British Virgin Islands (n=1), Barbados (n=17), Antigua and Barbuda (n=2), Belize (n=8), Bahamas (n=7), Bermuda (n=5), Puerto Rico (n=16)                                                                                                                                                                                                                                                                                                                                        |
| <b>South America</b><br>(n=8 212)       | Guatemala (n=89), Argentina (n=483), Bolivia (n=132), Brazil (n=1 138), Guyana (n=74), Chile (n=4 471), Columbia (n=619), Ecuador (n=166), French Guyana (n=1), Paraguay (n=45), Peru (n=519), Surinam (n=23), Uruguay (n=160), Venezuela (n=292)                                                                                                                                                                                                                                                                                                                                                                                                                                                                                                                                                                                                                                                             |
| <b>Oceania/Pacific</b><br>(n=1 332)     | American Samoa (n=1), Australia (n=931), Salomon Islands (n=2), Cook islands (n=4), Fiji (n=24), French Polynesia (n=3), Tonga (n=5) Tuvalu (n=1), New Zealand (n=346), Federated states of Micronesia (n=1), Samoa (n=2), New Caledonia (n=6), Papua New Guinea(n=5), Palau (n=1)                                                                                                                                                                                                                                                                                                                                                                                                                                                                                                                                                                                                                            |

**Table A2** Age standardized AMI event rates per 100 000 person-years for subjects aged 35-89 years, CVDNOR 1994-2009

| Country or region of birth | Men 35-89 years, n=1 634 520 |             |                         | Women 35-89 years, n=1 682 539 |             |                      |
|----------------------------|------------------------------|-------------|-------------------------|--------------------------------|-------------|----------------------|
|                            | N                            | AMIs        | SER (95 % CI )          | N                              | AMIs        | SER (95 % CI)        |
| Norway                     | 1 472 970                    | 156129      | 992 (987-997)           | 1 542 459                      | 95142       | 441 (438-444)        |
| <b>Western Europe</b>      | <b>59 931</b>                | <b>2768</b> | <b>1009 (965-1054)</b>  | <b>51 919</b>                  | <b>1486</b> | <b>367 (348-385)</b> |
| Denmark                    | 11 830                       | 986         | 1156 (1073-1239)        | 11 004                         | 403         | 363 (326-400)        |
| Finland                    | 3 384                        | 174         | 1397 (1125-1669)        | 4 148                          | 70          | 337 (252-422)        |
| Sweden                     | 13 191                       | 526         | 937 (843-1031)          | 13 139                         | 384         | 380 (342-419)        |
| The Netherlands            | 3 062                        | 104         | 1052 (785-1320)         | 2 416                          | 37          | 283 (187-379)        |
| Great Britain              | 10 268                       | 340         | 824 (700-948)           | 6 591                          | 245         | 395 (345-444)        |
| Germany                    | 8 664                        | 300         | 908 (781-1035)          | 7 390                          | 198         | 370 (318-423)        |
| <b>Eastern Europe</b>      | <b>23 801</b>                | <b>545</b>  | <b>1216 (1102-1329)</b> | <b>15 324</b>                  | <b>154</b>  | <b>371 (309-433)</b> |
| Poland                     | 16 083                       | 252         | 1243 (1067-1418)        | 5 804                          | 51          | 316 (217-415)        |
| Russia                     | 1 499                        | 36          | 1181 (783-1579)         | 4 396                          | 23          | 374 (217-530)        |
| Hungary                    | 938                          | 115         | 1079 (831-1326)         | 675                            | 39          | 541 (360-722)        |
| <b>Former Yugoslavia</b>   | <b>10 370</b>                | <b>556</b>  | <b>1167 (1019-1316)</b> | <b>9 582</b>                   | <b>269</b>  | <b>702 (603-801)</b> |
| Bosnia-Herzegovina         | 4 852                        | 326         | 1087 (919-1255)         | 5 055                          | 179         | 684 (565-804)        |
| Kosovo                     | 2 838                        | 91          | 1290 (646-1933)         | 2 226                          | 37          | 971 (578-1364)       |
| <b>Middle East</b>         | <b>15 952</b>                | <b>501</b>  | <b>1026 (840-1211)</b>  | <b>9 788</b>                   | <b>99</b>   | <b>542 (389-694)</b> |
| Turkey                     | 3 684                        | 142         | 715 (552-877)           | 2 425                          | 40          | 736 (405-1067)       |
| Iraq                       | 5 384                        | 139         | 1229 (849-1609)         | 2 844                          | 22          | 493 (215-771)        |
| Iran                       | 5 008                        | 165         | 991 (714-1268)          | 3 427                          | 30          | 510 (234-786)        |
| <b>North Africa</b>        | <b>4 122</b>                 | <b>73</b>   | <b>630 (354-907)</b>    | <b>1 847</b>                   | <b>9</b>    | <b>136 (31-241)</b>  |
| Morocco                    | 2 277                        | 43          | 590 (252-927)           | 1 223                          | 5           | 116 (00-236)         |
| <b>Sub-Saharan Africa</b>  | <b>10 641</b>                | <b>161</b>  | <b>636 (444-828)</b>    | <b>7 301</b>                   | <b>34</b>   | <b>247 (150-343)</b> |
| Somalia                    | 3 623                        | 60          | 851 (324-1378)          | 2 575                          | 9           | 170 (57-284)         |
| <b>South Asia</b>          | <b>13 491</b>                | <b>916</b>  | <b>1327 (1169-1485)</b> | <b>10 829</b>                  | <b>210</b>  | <b>619 (511-727)</b> |
| Sri Lanka                  | 3 760                        | 135         | 1329 (786-1873)         | 3 045                          | 25          | 453 (226-680)        |
| India                      | 2 560                        | 131         | 895 (679-1111)          | 2 075                          | 51          | 649 (461-838)        |
| Pakistan                   | 6 283                        | 633         | 1533 (1306-1761)        | 5 171                          | 131         | 646 (477-815)        |
| <b>Southeast Asia</b>      | <b>6 467</b>                 | <b>155</b>  | <b>564 (436-692)</b>    | <b>14 596</b>                  | <b>75</b>   | <b>312 (223-402)</b> |
| Philippines                | 1 258                        | 32          | 288 (183-393)           | 4 725                          | 11          | 53 (13-93)           |
| Vietnam                    | 4 433                        | 100         | 528 (383-673)           | 4 337                          | 40          | 291 (191-391)        |
| <b>East Asia</b>           | <b>2 975</b>                 | <b>63</b>   | <b>672 (493-852)</b>    | <b>3 724</b>                   | <b>29</b>   | <b>225 (140-311)</b> |
| China                      | 1 949                        | 51          | 679 (485-874)           | 2 216                          | 18          | 196 (105-286)        |
| <b>Central-Asia</b>        | <b>1 382</b>                 | <b>39</b>   | <b>1285 (344-2226)</b>  | <b>1 235</b>                   | <b>12</b>   | <b>668 (42-1294)</b> |
| <b>North America</b>       | <b>6 976</b>                 | <b>377</b>  | <b>768 (691-846)</b>    | <b>7 746</b>                   | <b>336</b>  | <b>355 (315-394)</b> |
| USA                        | 6 089                        | 351         | 791 (709-874)           | 6 724                          | 288         | 331 (292-371)        |
| <b>Central-America</b>     | <b>731</b>                   | <b>19</b>   | <b>927 (346-1508)</b>   | <b>1 058</b>                   | <b>6</b>    | <b>101 (15-187)</b>  |
| <b>South-America</b>       | <b>3 942</b>                 | <b>113</b>  | <b>916 (594-1238)</b>   | <b>4 495</b>                   | <b>45</b>   | <b>292 (192-393)</b> |
| Chile                      | 2 500                        | 76          | 476 (278-673)           | 2 071                          | 18          | 216 (87-346)         |
| <b>Oseania/Pacific</b>     | <b>769</b>                   | <b>15</b>   | <b>1236 (511-1961)</b>  | <b>636</b>                     | <b>6</b>    | <b>164 (28-300)</b>  |

AMI: Acute Myocardial Infarction; SER: Standardized event rate; CI: Confidence Interval

**Table A3** Age standardized stroke event rates per 100 000 person-years for subjects aged 35-89 years, CVDNOR 1994-2009

| Country or region of birth | Men 35-89 years, n=1 634 520 |             |                       | Women 35-89 years, n=1 682 539 |             |                        |
|----------------------------|------------------------------|-------------|-----------------------|--------------------------------|-------------|------------------------|
|                            | N                            | Strokes     | SER (95 % CI)         | N                              | Strokes     | SER (95 % CI)          |
| Norway                     | 1 472 970                    | 114072      | 744 (739-748)         | 1 542 459                      | 109861      | 509 (506-512)          |
| <b>Western Europe</b>      | <b>59 931</b>                | <b>1858</b> | <b>763 (723-804)</b>  | <b>51 919</b>                  | <b>1990</b> | <b>495 (473-517)</b>   |
| Denmark                    | 11 830                       | 696         | 846 (774-919)         | 11 004                         | 535         | 492 (449-536)          |
| Finland                    | 3 384                        | 125         | 847 (650-1043)        | 4 148                          | 122         | 545 (439-651)          |
| Sweden                     | 13 191                       | 356         | 727 (641-813)         | 13 139                         | 510         | 501 (458-545)          |
| The Netherlands            | 3 062                        | 73          | 743 (524-962)         | 2 416                          | 44          | 334 (230-438)          |
| Great Britain              | 10 268                       | 196         | 641 (520-762)         | 6 591                          | 299         | 488 (433-543)          |
| Germany                    | 8 664                        | 220         | 883 (748-1018)        | 7 390                          | 266         | 505 (444-567)          |
| <b>Eastern Europe</b>      | <b>23 801</b>                | <b>350</b>  | <b>872 (773-971)</b>  | <b>15 324</b>                  | <b>224</b>  | <b>492 (423-562)</b>   |
| Poland                     | 16 083                       | 159         | 924 (767-1081)        | 5 804                          | 82          | 442 (330-553)          |
| Russia                     | 1 499                        | 13          | 404 (172-636)         | 4 396                          | 44          | 526 (350-702)          |
| Hungary                    | 938                          | 82          | 952 (681-1223)        | 675                            | 41          | 600 (404-796)          |
| <b>Former Yugoslavia</b>   | <b>10 370</b>                | <b>290</b>  | <b>725 (607-844)</b>  | <b>9 582</b>                   | <b>249</b>  | <b>653 (558-749)</b>   |
| Bosnia-Herzegovina         | 4 852                        | 182         | 711 (572-850)         | 5 055                          | 179         | 666 (550-781)          |
| Kosovo                     | 2 838                        | 29          | 867 (123-1610)        | 2 226                          | 26          | 661 (372-951)          |
| <b>Middle East</b>         | <b>15 952</b>                | <b>191</b>  | <b>679 (493-865)</b>  | <b>9 788</b>                   | <b>93</b>   | <b>449 (320-578)</b>   |
| Turkey                     | 3 684                        | 59          | 440 (263-617)         | 2 425                          | 23          | 555 (233-876)          |
| Iraq                       | 5 384                        | 65          | 676 (387-965)         | 2 844                          | 37          | 566 (363-769)          |
| Iran                       | 5 008                        | 52          | 682 (377-987)         | 3 427                          | 27          | 351 (156-545)          |
| <b>North Africa</b>        | <b>4 122</b>                 | <b>40</b>   | <b>437 (167-708)</b>  | <b>1 847</b>                   | <b>17</b>   | <b>465 (209-721)</b>   |
| Morocco                    | 2 277                        | 15          | 114 (51-177)          | 1 223                          | 10          | 347 (97-597)           |
| <b>Sub-Saharan Africa</b>  | <b>10 641</b>                | <b>158</b>  | <b>760 (542-977)</b>  | <b>7 301</b>                   | <b>55</b>   | <b>404 (273-534)</b>   |
| Somalia                    | 3 623                        | 64          | 885 (566-1204)        | 2 575                          | 13          | 201 (61-342)           |
| <b>South Asia</b>          | <b>13 491</b>                | <b>295</b>  | <b>655 (515-796)</b>  | <b>10 829</b>                  | <b>200</b>  | <b>628 (512-744)</b>   |
| Sri Lanka                  | 3 760                        | 41          | 403 (200-606)         | 3 045                          | 29          | 413 (216-610)          |
| India                      | 2 560                        | 61          | 677 (405-948)         | 2 075                          | 39          | 547 (364-731)          |
| Pakistan                   | 6 283                        | 186         | 682 (494-870)         | 5 171                          | 127         | 736 (542-929)          |
| <b>Southeast-Asia</b>      | <b>6 467</b>                 | <b>159</b>  | <b>696 (550-841)</b>  | <b>14 596</b>                  | <b>208</b>  | <b>593 (480-706)</b>   |
| Philippines                | 1 258                        | 21          | 522 (62-983)          | 4 725                          | 50          | 244 (139-348)          |
| Vietnam                    | 4 433                        | 120         | 709 (547-870)         | 4 337                          | 115         | 647 (510-784)          |
| <b>East Asia</b>           | <b>2 975</b>                 | <b>74</b>   | <b>703 (530-876)</b>  | <b>3 724</b>                   | <b>72</b>   | <b>526 (398-654)</b>   |
| China                      | 1 949                        | 59          | 700 (513-888)         | 2 216                          | 47          | 488 (348-628)          |
| <b>Central-Asia</b>        | <b>1 382</b>                 | <b>8</b>    | <b>308 (2-614)</b>    | <b>1 235</b>                   | <b>15</b>   | <b>1132 (234-2030)</b> |
| <b>North-America</b>       | <b>6 976</b>                 | <b>317</b>  | <b>643 (573-713)</b>  | <b>7 746</b>                   | <b>427</b>  | <b>478 (430-525)</b>   |
| USA                        | 6 089                        | 285         | 638 (564-711)         | 6 724                          | 381         | 479 (428-530)          |
| <b>Central-America</b>     | <b>731</b>                   | <b>18</b>   | <b>886 (353-1419)</b> | <b>1 058</b>                   | <b>12</b>   | <b>369 (81-657)</b>    |
| <b>South-America</b>       | <b>3 942</b>                 | <b>60</b>   | <b>691 (376-1005)</b> | <b>4 495</b>                   | <b>69</b>   | <b>472 (339-605)</b>   |
| Chile                      | 2 500                        | 40          | 443 (94-791)          | 2 071                          | 26          | 361 (184-539)          |
| <b>Oseania/Pacific</b>     | <b>769</b>                   | <b>7</b>    | <b>633 (92-1174)</b>  | <b>636</b>                     | <b>8</b>    | <b>227 (68-387)</b>    |

SER: Standardized event rate; CI: Confidence Interval
